# Supplementary material
Source: MDPI journal article supplement (https://www.mdpi.com/2072-4292/14/6/1426)
Supplement: s1 [file s1]

## TiO<sub>2</sub> content

Lucey et al. [1] provided algorithms to inverse the TiO<sub>2</sub> abundances based on Clementine UV/VIS images. However, the available ground-based telescopic data do not cover the shortest IIM wavelengths, the uncrosscalibrated IIM data were used for the inversion of TiO<sub>2</sub> content. Wu et al. [2] developed a newly calibration presented. The equations are as follows:

$$\theta_{Ti} = \arctan \left( \frac{\frac{R_{561} - 0.71}{R_{757} - 0.07}}{\frac{R_{757} - 0.07}{R_{757} - 0.07}} \right)$$

$$TiO_2(wt\%) = \theta_{Ti}^{4.964} \times 2.6275$$

where R561 and R757 are the reflectance at 561 nm, 757 nm.

In this study, TiO<sub>2</sub> abundances were derived from the IIM data. The TiO<sub>2</sub> abundance was derived using algorithm described by Wu et al. [2]

## Mg#

Mg-number (Mg#=atomic Mg/(Mg+Fe)) [3] serves as an important petrologic discriminator when analyzing and understanding lunar rocks and crustal evolutionary models, which can be used to reflect the degree of basalts separation crystallization. The specific calculation formula is as follows:

$$Mg\# = 100 * MgO / (24.305 + 15.999) / (MgO / (24.305 + 15.999) + FeO / (55.847 + 15.999))$$

The MgO and FeO contents in the LP data [4] are used to obtain the value of Mg# in this data.

**Table S1.** TiO<sub>2</sub> content and Mg# of the Orientale basalts

| class | name | Mg#         | TiO <sub>2</sub> |
|-------|------|-------------|------------------|
| CBB   | c1   | 43.89978681 | 1.917575912      |
|       | c2   | 54.3750541  | 1.332195481      |
|       | c3   | 34.60285618 | 1.958781852      |
|       | c4   | 48.39383163 | 3.051029511      |
|       | c5   | 10.54068308 | 1.99750368       |
|       | c6   | 47.55021638 | 1.193795863      |
|       | c7   | 28.04689006 | 1.632543331      |
|       | c8   | 24.07069235 | 1.862472846      |
|       | c9   | 48.64367294 | 1.499264595      |
| RBB   | e1   | 43.44113159 | 0.745796998      |
|       | e2   | 53.69983768 | 0.85406293       |
|       | e3   | 38.6821111  | 1.108367237      |
|       | e4   | 38.38363746 | 1.736179885      |
|       | e5   | 38.36469412 | 1.632187955      |
|       | e6   | 72.34369405 | 2.113493272      |
|       | e7   | 68.16956806 | 1.533291675      |

**a Greely et al. 1993**

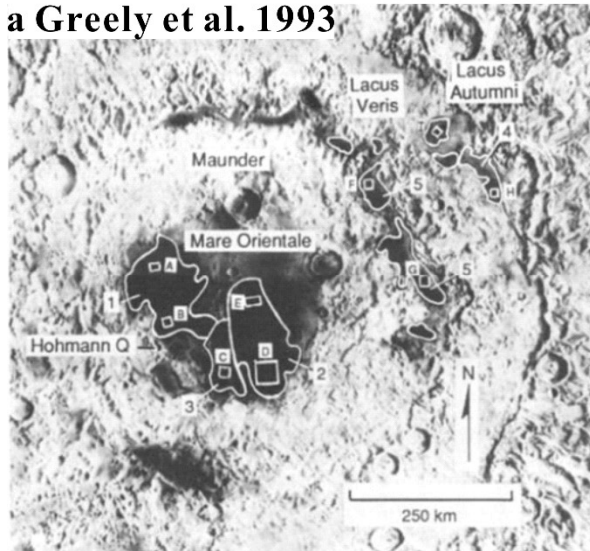

**b Whitten et al. (2011)**

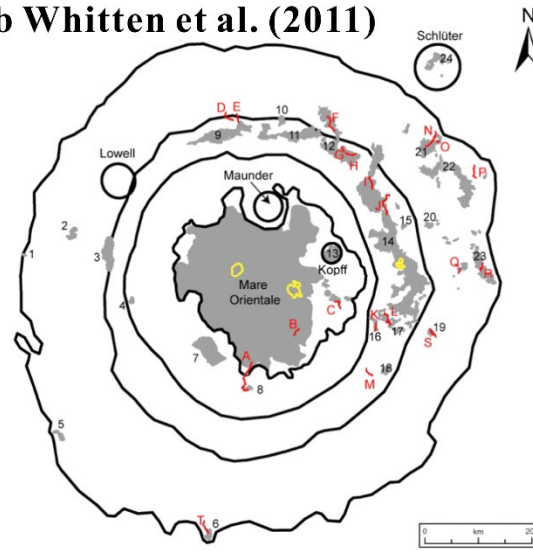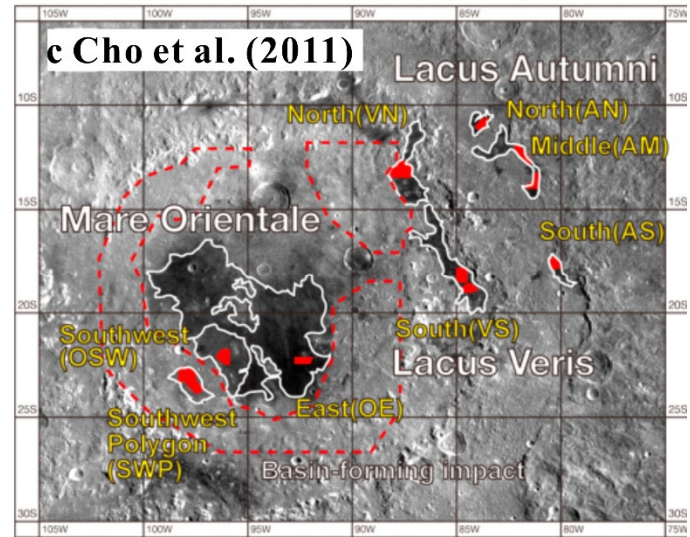

**Figure S1. The division of geological units in previous papers**

## References

1. Lucey, P.G.; Blewett, D.T.; Hawke, B.R. Mapping the FeO and TiO<sub>2</sub> content of the lunar surface multispectral imagery. *J Geophys Res-Planet* 1998, 103, 3679-3699, doi:Doi 10.1029/97je03019.
2. Wu, Y.Z.; Xue, B.; Zhao, B.C.; Lucey, P.; Chen, J.; Xu, X.S.; Li, C.L.; Ouyang, Z.Y. Global estimates of lunar iron and titanium contents from the Chang' E-1 IIM data. *J Geophys Res-Planet* 2012, 117, doi:Artn E02001 10.1029/2011je003879.
3. Cahill, J.; Lucey, P.; Gillis, J.; Steutel, D. Global Mapping of Mg-Number Derived from Clementine Data. In *Proceedings of AGU Fall Meeting Abstracts*, 2004; pp. P23A-0232.
4. Prettyman, T.; Hagerty, J.; Elphic, R.; Feldman, W.; Lawrence, D.; McKinney, G.; Vaniman, D. Elemental composition of the lunar surface: Analysis of gamma ray spectroscopy data from Lunar Prospector. *Journal of Geophysical Research: Planets* 2006, 111.
